# Supplementary material for: Immunophenotypic changes of leukemic blasts in children with relapsed/refractory B-cell precursor acute lymphoblastic leukemia who have been treated with blinatumomab
Source: PubMed Central journal article supplement — Haematologica. 2020 Dec 30;106(7):2009–12. doi: 10.3324/haematol.2019.241596 (PMC8252946; doi:10.3324/haematol.2019.241596), 2020-12-30
Supplement: 2019_241596_Mikhailova_SUPPL.pdf [file 2019_241596_Mikhailova_SUPPL.pdf]

**Immunophenotypic changes of leukemic blasts in children with relapsed/refractory B-cell precursor acute lymphoblastic leukemia who have been treated with blinatumomab**

---

*Ekaterina Mikhailova, Evgeny Gluhanyuk, Olga Illarionova, Elena Zerkalenkova, Svetlana Kashpor, Natalia Miakova, Yulia Diakonova, Yulia Olshanskaya, Larisa Shelikhova, Galina Novichkova, Michael Maschan, Alexey Maschan and Alexander Popov*

*Dmitry Rogachev National Medical Research Center of Pediatric Hematology, Oncology and Immunology, Moscow, Russian Federation*

*Correspondence: ALEXANDER POPOV - [uracytometry@gmail.com](mailto:uracytometry@gmail.com)*

*doi:10.3324/haematol.2019.241596*

**Table S1.** Clinical and genetic characteristics of the studied patients (n=90)

|                                                                                                  |                                |
|--------------------------------------------------------------------------------------------------|--------------------------------|
| <b>n</b>                                                                                         | 90                             |
| <b>Sex, m/f</b>                                                                                  | 55/35                          |
| <b>Age</b>                                                                                       | 9,0 years (range 1 - 18 years) |
| <b>Diagnosis</b>                                                                                 |                                |
| BI-ALL                                                                                           | 10                             |
| BII-ALL                                                                                          | 72                             |
| BIII-ALL                                                                                         | 5                              |
| BIV-ALL                                                                                          | 2                              |
| B-lymphoblastic lymphoma                                                                         | 1                              |
| <b>Chromosomal aberration</b>                                                                    |                                |
|                                                                                                  | 77/90 (85,6%)                  |
| t(12;21)(p13;q22)/ <i>ETV6-RUNX1</i>                                                             | 12                             |
| <i>KMT2A</i> rearranged                                                                          | 11                             |
| Intrachromosomal amplification of <i>RUNX1</i>                                                   | 7                              |
| <i>IgH</i> rearranged                                                                            | 6                              |
| <i>E2A</i> rearranged                                                                            | 4                              |
| <i>CRLF2</i> rearranged                                                                          | 3                              |
| t(9;22)(q34;q11)/ <i>BCR-ABL1</i>                                                                | 2                              |
| Complex karyotype                                                                                | 12                             |
| Hyperdiploid                                                                                     | 12                             |
| Hypodiploid                                                                                      | 3                              |
| Others aberrations ( <i>ABL1</i> rearranged, monosomy 7, <i>PDGFRbeta</i> rearranged, trisomy 3) | 5                              |
| No recurrent chromosomal aberrations                                                             | 13                             |
| <b>Type of therapy</b>                                                                           |                                |
| blinatumomab                                                                                     | 23                             |
| blinatumomab->HSCT                                                                               | 65                             |
| blinatumomab1->HSCT->blinatumomab2                                                               | 2                              |
| <b>Blasts in bone marrow before course of blinatumomab</b>                                       |                                |
| <0.001%                                                                                          | 8                              |
| ≥0.001% and <5%                                                                                  | 47                             |
| ≥5%                                                                                              | 35                             |

**Table S2.** List of monoclonal antibodies used for MRD-detection. APC – allophycocyanin, PE – phycoerythrin, Cy7 – cyanin 7, Cy5.5 – Cyanin 5.5, ECD – tandem conjugate of PE with TexasRed, PerCP – peridinin-chlorophyll-protein, FITC –fluorescein isothiocyanate

| Antibody           | Clone     | Fluorochrome                 | Manufacturer |
|--------------------|-----------|------------------------------|--------------|
| Obligatory markers |           |                              |              |
| CD19               | SJ25C1    | APC                          | BD           |
|                    |           | PE-Cy7                       |              |
|                    | J3-119    | PE-Cy7                       | BC           |
| CD10               | HI10a     | PE                           | BD           |
|                    |           | BB515                        |              |
|                    |           | BV421                        |              |
|                    | ALB1      | PE-Cy5.5                     | BC           |
| CD34               | 581       | ECD                          | BC           |
|                    | 8G12      | PE-Cy7                       | BD           |
|                    |           | APC                          |              |
|                    |           | PE-CF594                     |              |
| CD20               | L27       | PerCP                        | BD           |
|                    |           | APC-H7                       |              |
|                    | B9.E9     | APC-Alexa750                 | BC           |
| CD45               | 2D1       | APC-Cy7                      | BD           |
|                    |           | PerCP                        |              |
|                    | J.33      | Krome Orange<br>APC-Alexa750 | BC           |
| CD38               | HIT2      | APC-R700                     | BD           |
|                    |           | BV510                        |              |
|                    | LS198-4-3 | APC-Alexa700                 | BC           |
| CD58               | AICD58    | FITC                         | BC           |
|                    | 3C1       | FITC                         | BD           |
| Additional markers |           |                              |              |
| CD22               | S-HCL-1   | PE                           | BD           |
|                    |           | PerCP-Cy5.5                  |              |
|                    | HIB22     | BV650                        |              |
| CD24               | ML5       | BV786                        | BD           |
|                    | ALB9      | APC                          | BC           |

**Table S3.** Outcomes in patients who did not relapse, but had leukemic cells on MRD level by MFC in BM at least once during the follow-up period

| <b>Patient №</b> | <b>Blast cells in BM, %</b> | <b>CD19 on blast cells, %</b> | <b>Outcomes after MRD reappearance</b>                                 |
|------------------|-----------------------------|-------------------------------|------------------------------------------------------------------------|
| Patient 1        | 2,98                        | 0                             | Chemotherapy -> Allo-HSCT -> Death (sepsis)                            |
| Patient 2        | 0,01                        | 100                           | MFC-MRD elimination                                                    |
| Patient 3        | 0,01                        | 100                           | MFC-MRD elimination                                                    |
| Patient 4        | 0,29                        | 100                           | Chemotherapy -> MRD level -> CD19 CAR-T -> MFC-MRD elimination         |
| Patient 5        | 1,74                        | 5                             | CD19 CAR-T (CD19+ blasts in CSF) -> Progression                        |
| Patient 6        | 0,51                        | 100                           | CD19 CAR-T -> CD19- relapse                                            |
| Patient 7        | 0,03                        | 100                           | Allo-HSCT -> MFC-MRD elimination                                       |
| Patient 8        | 0,01                        | 100                           | Allo-HSCT -> MFC-MRD level -> 3 courses of Blinatumomab -> Progression |
| Patient 9        | 0,04                        | 20                            | Chemotherapy -> Allo-HSCT is planned                                   |
| Patient 10       | 0,17                        | 100                           | CD19 CAR-T -> Neurotoxicity (MRD-status unknown)                       |

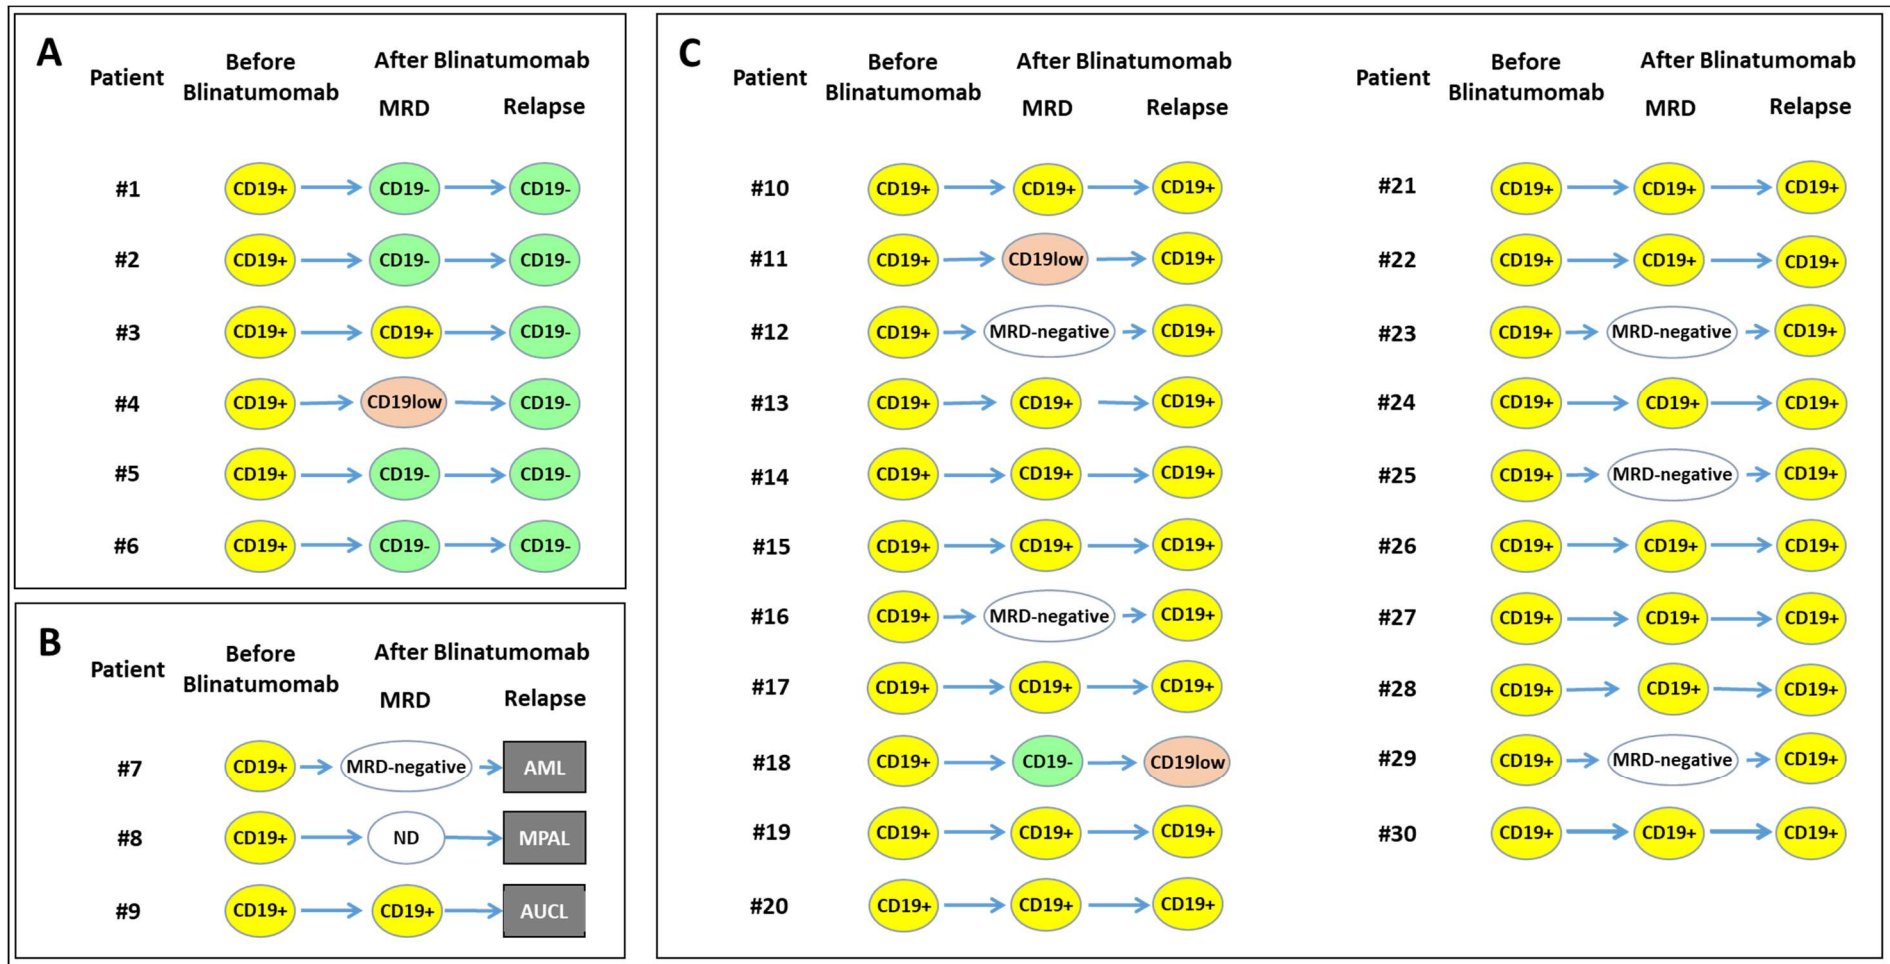

**Figure S1.** Changes in CD19-status of residual leukemic cells at MRD-level and at subsequent relapse in 30 patients with bone marrow relapse occurred. Panel **A** shows CD19-negative relapses (n=6), panel **B** – those who experienced “lineage switch” to acute myeloid leukemia (AML, pt #7), mixed-phenotype acute leukemia (MPAL, pt #8) and acute unclassifiable leukemia (AUCL, pt #9), while panel **C** – CD19-positive relapses (n= 21). CD19-negativity was defined as less than 20% of tumor cells found to be CD19-positive, CD19-positivity – as more than 75% of leukemic blasts are CD19-positive and CD19low was dimmed if number of CD19-positive leukemic blasts was between 20% and 75%. ND – no data
